# Supplementary material for: Effects of estrogen on spatial navigation and memory
Source: PubMed Central journal article supplement (PMC11031496; doi:10.1007/s00213-024-06539-3), 2024-02-26
Supplement: 213_2024_6539_MOESM1_ESM.pdf [file 213_2024_6539_MOESM1_ESM.pdf]

## Supplementary Information

### *Effects of estrogen on spatial navigation and memory*

by G Joue, T Navarro-Schröder, J Achtzehn, S Moffat, N Hennies, J Fuß, C Döller, T Wolbers & T Sommer.

### **Additional Results**

Details of regression models and results are shown in Table [S1](#).

women become more relaxed in test situations over time and hence perform better.

### **Relation to the classic non-navigation-based spatial task: mental rotation**

Other tasks testing general spatial ability are often conflated with spatial navigation. A common such task is the mental rotation task (e.g. of 3-D blocks: [Shepard and Metzler 1971](#); or perspective line drawings of objects: [Vandenberg and Kuse 1978](#)). Mental rotation performance has been found to be correlated with faster wayfinding through a maze, virtual ([Moffat et al, 1998](#)) or real ([Malinowski, 2001](#)), and with fewer errors but only after the maze environment has been learned – but also correlated with tasks involving an egocentric strategy ([Moffat et al, 1998](#)). Indeed, mental rotation tasks can be solved with either egocentric or allocentric views ([Zacks et al, 2002](#)) and is arguably not a naturalistic task with weak and variable correlation with other spatial navigation tasks.

Mental rotation performance have been reported to fluctuate with E2, though reports are not consistent in women ([Noreika et al, 2014](#); [Shirazi et al, 2021](#); [Vashro and Cashdan, 2015](#)) or in men ([Peragine et al, 2020](#)). Otherwise, males tend to perform better, though this advantage decreases when more items are tested ([Voyer et al, 1995](#)), suggesting that performance differences stem from stress more than ability and that

**Table S1** Regression model predictions of (back-transformed) spatial navigation metrics reflecting strength of cognitive maps and spatial orientation.

| <i>predictor</i>                                                                                                                                  | <i>metric estimates</i>                     |                                             |                                      |                                          |                                               |                                                    |
|---------------------------------------------------------------------------------------------------------------------------------------------------|---------------------------------------------|---------------------------------------------|--------------------------------------|------------------------------------------|-----------------------------------------------|----------------------------------------------------|
|                                                                                                                                                   | dist/path <sup>(O)</sup><br>$e^{\log-norm}$ | idle time <sup>(O)</sup><br>$e^{\log-norm}$ | y-flips <sup>(O)</sup><br><i>CMP</i> | LISAS <sup>(O),1</sup><br><i>log-log</i> | sinuosity <sup>(O),2</sup><br>$e^{\log-norm}$ | pt RT <sup>(T)</sup><br><i>inv.G</i> ( $10^{-3}$ ) |
| (Intercept)                                                                                                                                       | 2996.0*                                     | 9.6*                                        | 1.2*                                 | 3.6*                                     | 0.01*                                         | 5.2*                                               |
|                                                                                                                                                   | [2367.1, 3792.0]                            | [7.7, 12.1]                                 | [1.2, 1.3]                           | [3.5, 3.7]                               | [0.01, 0.02]                                  | [3.6, 7.1]                                         |
| Sex <sub>M</sub>                                                                                                                                  | <b>1.2</b>                                  | <b>0.7*</b>                                 | <b>1.3*</b>                          | <b>-0.2*</b>                             | <b>1.3*</b>                                   | -0.6                                               |
|                                                                                                                                                   | [1.0, 1.3]                                  | [0.5, 0.9]                                  | [1.3, 1.4]                           | [-0.3, -0.1]                             | [1.1, 1.4]                                    | [-3.0, 1.7]                                        |
| Grp <sub>E2</sub>                                                                                                                                 | 1.1                                         | 1.2                                         | <b>1.2*</b>                          | -0.02                                    | 0.90 <sup>+</sup>                             | <b>-1.9<sup>+</sup></b>                            |
|                                                                                                                                                   | [1.0, 1.2]                                  | [0.9, 1.6]                                  | [1.1, 1.2]                           | [-0.1, 0.1]                              | [0.8, 1.0]                                    | [-4.1, 0.2]                                        |
| Sex <sub>M</sub> :Grp <sub>E2</sub>                                                                                                               | 0.9                                         | 0.9                                         | <b>0.8*</b>                          | 0.08                                     |                                               | 1.3                                                |
|                                                                                                                                                   | [0.8, 1.1]                                  | [0.6, 1.2]                                  | [0.8, 0.9]                           | [-0.1, 0.2]                              |                                               | [-1.6, 4.3]                                        |
| <sup>1</sup> log( <i>t</i> <sub>loc<sub>l</sub></sub> ) or <sup>2</sup> <i>t</i> <sub>path<sub>p</sub></sub>                                      |                                             |                                             |                                      | <b>-0.2*</b>                             | <b>1.0*</b>                                   |                                                    |
|                                                                                                                                                   |                                             |                                             |                                      | [-0.2, -0.2]                             | [1.0, 1.0]                                    |                                                    |
| <sup>1</sup> Sex <sub>M</sub> :log( <i>t</i> <sub>loc<sub>l</sub></sub> ) or <sup>2</sup> Sex <sub>M</sub> : <i>t</i> <sub>path<sub>p</sub></sub> |                                             |                                             |                                      | <b>-0.02*</b>                            | <b>1.0*</b>                                   |                                                    |
|                                                                                                                                                   |                                             |                                             |                                      | [-0.04, -0.00]                           | [1.0, 1.0]                                    |                                                    |
| Grp <sub>E2</sub> :Sex <sub>M</sub> :log( <i>t</i> <sub>loc<sub>l</sub></sub> )                                                                   |                                             |                                             |                                      | <b>-0.03*</b>                            |                                               |                                                    |
|                                                                                                                                                   |                                             |                                             |                                      | [-0.1, -0.01]                            |                                               |                                                    |
| <i>R</i> <sup>2</sup>                                                                                                                             | 0.0 <sup>M</sup> /0.5 <sup>C</sup>          | 0.1 <sup>M</sup> /0.6 <sup>C</sup>          |                                      | 0.2 <sup>M</sup> /0.5 <sup>C</sup>       | 0.01 <sup>M</sup> /0.13 <sup>C</sup>          |                                                    |
| Deviance                                                                                                                                          |                                             |                                             |                                      |                                          | 2.1                                           |                                                    |
| N <sub>obs</sub>                                                                                                                                  | 3732                                        | 3732                                        | 3732                                 | 24031                                    | 24148                                         | 129                                                |
| N <sub>group<sub>Ss</sub></sub>                                                                                                                   | 129                                         | 129                                         |                                      | 129                                      | 129                                           |                                                    |
| N <sub>group<sub>path</sub></sub>                                                                                                                 | 36                                          | 36                                          |                                      |                                          |                                               |                                                    |
| σ <sup>2</sup>                                                                                                                                    | 0.5                                         | 0.3                                         |                                      | 0.1                                      | 1.02                                          |                                                    |
| τ <sub>Ss</sub>                                                                                                                                   | 0.1                                         | 0.3                                         |                                      | 0.1                                      | 0.1                                           |                                                    |
| τ <sub>path</sub>                                                                                                                                 | 0.4                                         | 0.1                                         |                                      |                                          |                                               |                                                    |
| <sup>1</sup> τ <sub>loc<sub>l</sub> Ss</sub> or <sup>2</sup> τ <sub>path<sub>p</sub> Ss</sub>                                                     |                                             |                                             |                                      |                                          | 0.06 – 0.1                                    | 0.00                                               |

Task for each metric is shown as a superscript: <sup>(O)</sup> arena, <sup>(T)</sup> town

Metrics: distances to target locations (dist/path), idle time while navigating (idle time), navigation direction changes along the y-axis (y-flips), trade-off between spatial accuracy and time spent navigating (LISAS), sinuosity of navigation paths, and time to complete pointing/dead-reckoning task (pt RT)

The residual variance (σ<sup>2</sup>) is reported with between-group variance for random intercept (τ; *loc* location, *Ss* subjects) and random slope (τ<sub>*x*|*y*</sub> for slope *x* given *y*) where applicable.

*CMP*: Conway-Maxwell Poisson

*inv.G*: inverse Gaussian with link  $1/\mu^2$  for response time for pointing (pt RT)

*R*<sup>2</sup> variants: <sup>M</sup>Marginal/Fixed effects, <sup>C</sup>Conditional/Total

Null hypothesis values: \* outside the 95% confidence interval or <sup>+</sup> at the bounds of the interval.

Colon indicates interaction

## References

- Malinowski JC (2001) Mental rotation and real-world wayfinding. *Percept Mot Skills* 92(1):19–30. <https://doi.org/10.2466/pms.2001.92.1.19>
- Moffat SD, Hampson E, Hatzipantelis M (1998) Navigation in a “virtual” maze: Sex differences and correlation with psychometric measures of spatial ability in humans. *Evol Hum Behav* 19(2):73–87. [https://doi.org/10.1016/S1090-5138\(97\)00104-9](https://doi.org/10.1016/S1090-5138(97)00104-9)
- Noreika D, Griškova-Bulanova I, Alaburda A, et al (2014) Progesterone and mental rotation task: Is there any effect? *BioMed Res Int* 2014. <https://doi.org/10.1155/2014/741758>
- Peragine D, Simeon-Spezzaferro C, Brown A, et al (2020) Sex difference or hormonal difference in mental rotation? the influence of ovarian milieu. *Psychoneuroendocrinology* 115:104,488. <https://doi.org/10.1016/j.psyneuen.2019.104488>
- Shepard RN, Metzler J (1971) Mental rotation of three-dimensional object. *Science* 171:701–703
- Shirazi TN, Levenberg K, Cunningham H, et al (2021) Relationships between ovarian hormone concentrations and mental rotations performance in naturally-cycling women. *Horm Behav* 127:104,886. <https://doi.org/10.1016/j.yhbeh.2020.104886>
- Vandenberg SG, Kuse AR (1978) Mental rotations, a group test of three-dimensional spatial visualization. *Percept Mot Skills* 47(2):599–604. <https://doi.org/10.2466/pms.1978.47.2.599>
- Vashro L, Cashdan E (2015) Spatial cognition, mobility, and reproductive success in north-western Namibia. *Evol Hum Behav* 36(2):123–129. <https://doi.org/10.1016/j.evolhumbehav.2014.09.009>
- Voyer D, Voyer S, Bryden MP (1995) Magnitude of sex differences in spatial abilities: A meta-analysis and consideration of critical variables. *Psychol Bull* 117:250–270. <https://doi.org/10.1037/0033-2909.117.2.250>
- Zacks JM, Ollinger JM, Sheridan MA, et al (2002) A parametric study of mental spatial transformations of bodies. *NeuroImage* 16(4):857–872. <https://doi.org/10.1006/nimg.2002.1129>
